# Supplementary material for: Rapid Fluorescence Quenching Detection of Escherichia coli Using Natural Silica-Based Nanoparticles
Source: PubMed Central journal article supplement (PMC7865786; doi:10.3390/s21030881), 2021-01-28
Supplement: sensors-21-00881-s001.pdf [file sensors-21-00881-s001.pdf]

Article

# Rapid Fluorescence Quenching Detection of *Escherichia Coli* using Natural Silica-Based Nanoparticles

S. N. Aisyiyah Jenie <sup>1,\*</sup>, Yuni Kusumastuti <sup>2,\*</sup>, Fransiska S.H. Krismastuti <sup>1</sup>, Yovilianda M. Untoro <sup>1</sup>, Rizna T. Dewi <sup>1</sup>, Linar Z. Udin <sup>1</sup> and Nina Artanti <sup>1</sup>

- <sup>1</sup> Research Centre for Chemistry, Indonesian Institute of Sciences-LIPI, Building 452, Kawasan Puspiptek, Tangerang Selatan, Banten 15314, Indonesia fran008@lipi.go.id (F.S.H.K.); yoviliandamauliti-vauntoro@gmail.com (Y.M.U.); rizn001@lipi.go.id (R.T.D.); lina004@lipi.go.id (L.Z.U.); nina001@lipi.go.id (N.A.)
- <sup>2</sup> Department of Chemical Engineering, Faculty of Engineering, Universitas Gadjah Mada, Jalan Grafika No. 2, Yogyakarta 55281, Indonesia
- \* Correspondence: siti045@lipi.go.id (S.N.A.J.); yuni\_kusumastuti@ugm.ac.id (Y.K.); Tel.: +62-21-7560929 (S.N.A.J.); Tel.: +62-274-513665 (Y.K.)

**Citation:** Jenie, S.N.A.; Kusumastuti, Y.; Krismastuti, F.S.H.; Untoro, Y.M.; Dewi, R.T.; Udin, L.Z.; Artanti, N. Rapid Fluorescence Quenching Detection of *Escherichia Coli* using Natural Silica-Based Nanoparticles. *Sensors* **2021**, *21*, x. <https://doi.org/10.3390/xxxxx>

Academic Editors: Azhar Zam and Dedy H.B. Wicaksono  
 Received: 11 December 2020  
 Accepted: 25 January 2021  
 Published: 28 January 2021

**Publisher’s Note:** MDPI stays neutral with regard to jurisdictional claims in published maps and institutional affiliations.

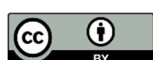

**Copyright:** © 2021 by the authors. Submitted for possible open access publication under the terms and conditions of the Creative Commons Attribution (CC BY) license (<http://creativecommons.org/licenses/by/4.0/>).

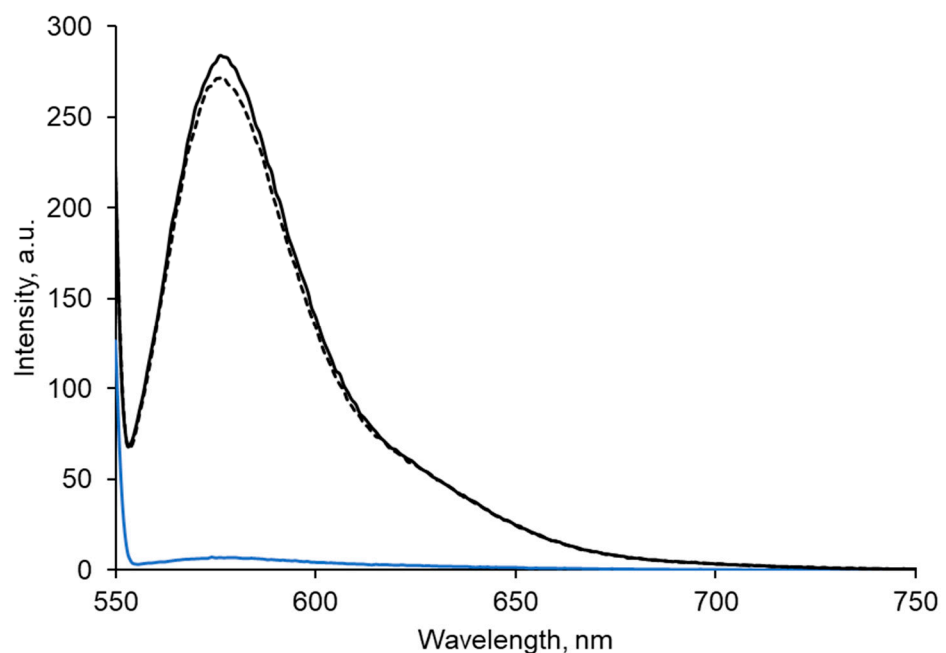

**Figure S1.** Fluorescence spectra of SNP-RB solution before (—) and after 2 hours (---). The fluorescence spectrum of aquadest (—) as the solvent was also measured.

**Table S1.** Specific surface area, pore size, pore volume and nanoparticle size of SNP and SNP-RB samples at reaction temperature of 90°C and aging time of 18 h.

| No | Nanoparticles | Specification                    |                |                                  |                        |
|----|---------------|----------------------------------|----------------|----------------------------------|------------------------|
|    |               | Surface Area (m <sup>2</sup> /g) | Pore Size (nm) | Pore Volume (cm <sup>3</sup> /g) | Nanoparticle size (nm) |
| 1  | SNP           | 44.37                            | 13.86          | 0.154                            | 135.24                 |
| 2  | SNP-RB        | 190.23                           | 27.89          | 1.326                            | 31.54                  |

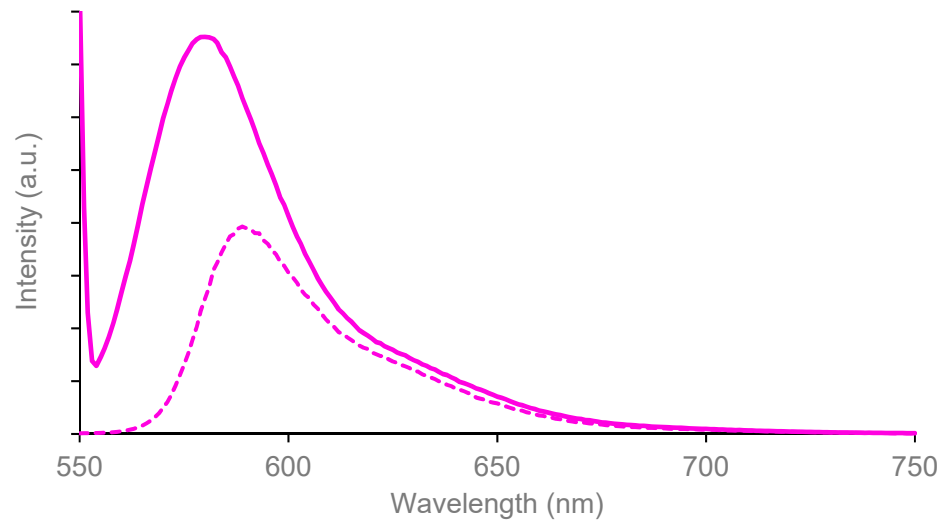

**Figure S2.** Fluorescence spectra of the nanoparticles samples compared to the fluorophore, Rhodamine-B in H<sub>2</sub>O at the same concentration of  $5 \times 10^{-5}$  M. The spectra corresponds to the emission of the fluorescent silica nanoparticles (FSNP) ( ) and Rhodamine-B (---).

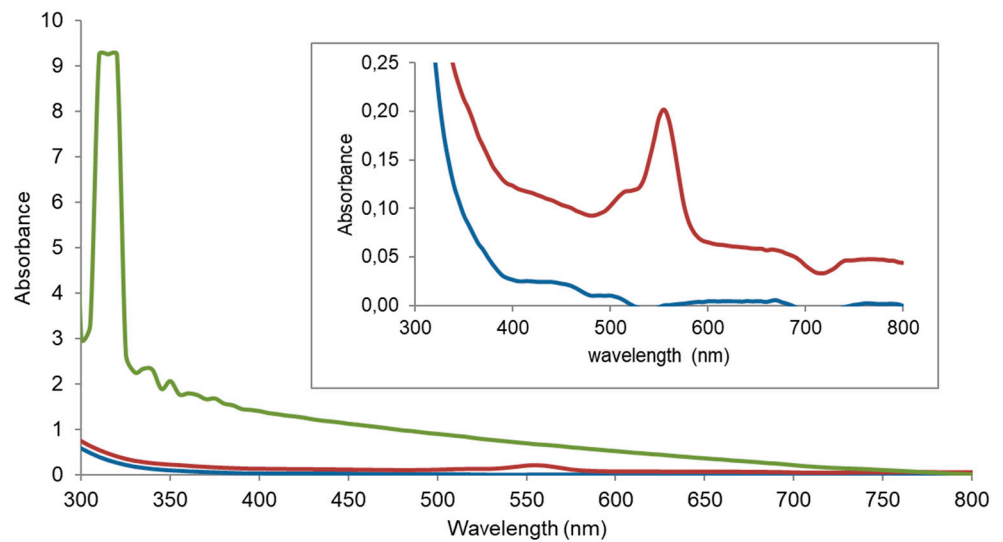

**Figure S3.** Absorbance spectra of PBS (blue spectrum), SNP-RB (red spectrum) and SNP-RB in the presence of *E.coli* proteins. Concentration of SNP-RB and *E.coli* was 1 mg/ml and  $1 \times 10^7$  CFU/ml, respectively.

The concentration of SNP-RB solution after detection calculated using the Beer-Lambert equation was 3.56 mg/ml. This concentration value was higher than that before detection of 1 mg/mL, proving that the SNP-RB nanoparticles indeed interact with the bacteria.
